# Supplementary material for: Sub-10 nm copper chromium oxide nanocrystals as a solution processed p-type hole transport layer for organic photovoltaics
Source: Royal Society of Chemistry journal article supplement (doi:10.1039/c6tc00541a), 2016-01-01
Supplement: c6tc00541a1.pdf [file c6tc00541a1.pdf]

## Supplementary Information

### Sub-10 nm Copper Chromium Oxide Nanocrystals As Solution Processed P-Type Hole Transport Layer For Organic Photovoltaics

Jian Wang, Yun-Ju Lee, Julia W. P. Hsu\*

Department of Materials Science & Engineering, The University of Texas at Dallas,  
Richardson, TX

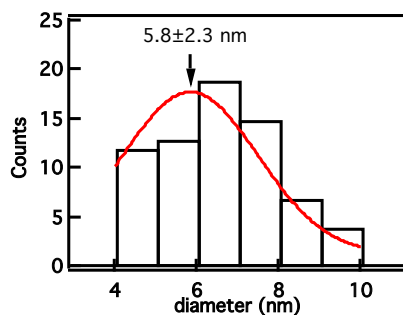

Figure S1. Histogram of individual CuCrO<sub>2</sub> nanocrystal size (measured from TEM images).

Figure S1 shows the histogram of individual CuCrO<sub>2</sub> nanocrystal sizes measured from transmission electron microscopy (TEM) images. A Gaussian fit shows that the averaged crystalline size is  $5.8 \pm 2.3$  nm.

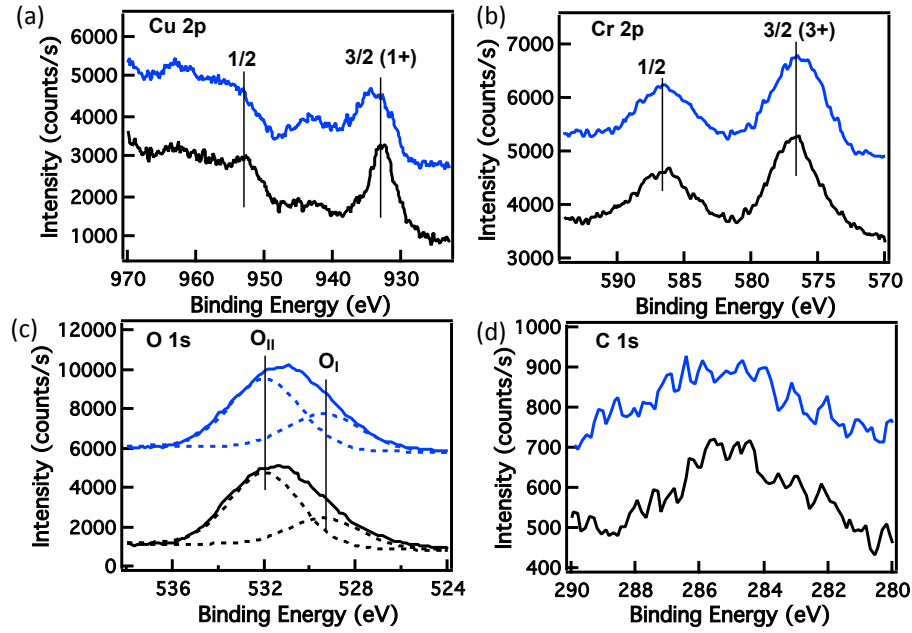

Figure S2. XPS spectra of (a) Cu 2p, (b) Cr 2p, (c) O 1s, and (d) C 1s, for as prepared  $\text{CuCrO}_2$  film (black) or UV-ozone treated  $\text{CuCrO}_2$  film (blue).

Figure S2 shows the X-ray photoelectron spectroscopy (XPS) of both as prepared and UV-ozone treated  $\text{CuCrO}_2$  films on a gold substrate (to avoid oxygen signals from substrate). As discussed in main text, the Cu 2p 3/2 and Cr 2p 3/2 peaks are located at 932.7 eV and 576.7 eV, respectively, which are consistent with previous reported binding energies of  $\text{Cu}^{1+}$  and  $\text{Cr}^{3+}$  in  $\text{CuCrO}_2$ .<sup>1</sup> The O 1s are fitted into two species: the lattice oxygen in bulk  $\text{CuCrO}_2$  at 529.3 eV ( $\text{O}_I$ ), and the dissociated oxygen or hydroxyl species on surface at 532.0 eV ( $\text{O}_{II}$ ).<sup>2,3</sup> The atomic ratio of Cu:Cr is determined as 0.6:1 from the as prepared  $\text{CuCrO}_2$  film according to  $\frac{\text{AREA}_{\text{Cu } 2p}}{\text{ASF}_{\text{Cu } 2p}} : \frac{\text{AREA}_{\text{Cr } 2p}}{\text{ASF}_{\text{Cr } 2p}}$ , where the AREA is the total peak area, and ASF is the atomic sensitivity factor of corresponding Cu 2p and Cr 2p signal. After UV-ozone treatment, intensities and binding energies of all elements stay the same except for Cu 2p (Data fit is shown in Figure 7b main text). To determine the

ratio of  $\text{Cu}^{1+}$ ,  $\text{Cu}^{2+}$ , and  $\text{Cu}(\text{OH})_2$  species in UV-ozone treated  $\text{CuCrO}_2$  film, we correct the intensities of  $\text{Cu}^{2+}$  and  $\text{Cu}(\text{OH})_2$  species with their contribution to the area of  $\text{Cu}^{2+}$  satellites. For example, the peak area of  $\text{Cu}^{2+}$  satellite,  $\text{Cu}(\text{OH})_2$ ,  $\text{Cu}^{2+}$ , and  $\text{Cu}^{1+}$  are denoted as  $AREA_{\text{Cu SL}}$ ,  $AREA_{\text{Cu}(\text{OH})_2}$ ,  $AREA_{\text{Cu}^{2+}}$ , and  $AREA_{\text{Cu}^{1+}}$ , respectively. After satellite area correction, the peak areas of  $\text{Cu}^{2+}$  and  $\text{Cu}(\text{OH})_2$ , i.e.  $AREA_{\text{Cu}^{2+}}^c$  and  $AREA_{\text{Cu}(\text{OH})_2}^c$ , are calculated as

$$AREA_{\text{Cu}^{2+}}^c = AREA_{\text{Cu}^{2+}} + AREA_{\text{Cu SL}} \times \frac{AREA_{\text{Cu}^{2+}}}{AREA_{\text{Cu}^{2+}} + AREA_{\text{Cu}(\text{OH})_2}}, \text{ and}$$

$$AREA_{\text{Cu}(\text{OH})_2}^c = AREA_{\text{Cu}(\text{OH})_2} + AREA_{\text{Cu SL}} \times \frac{AREA_{\text{Cu}(\text{OH})_2}}{AREA_{\text{Cu}^{2+}} + AREA_{\text{Cu}(\text{OH})_2}}, \text{ respectively.}$$

Finally, the ratio of  $\text{Cu}^{1+}$ ,  $\text{Cu}^{2+}$ , and  $\text{Cu}(\text{OH})_2$  species is calculated by  $AREA_{\text{Cu}^{1+}} : AREA_{\text{Cu}^{2+}}^c : AREA_{\text{Cu}(\text{OH})_2}^c$ .

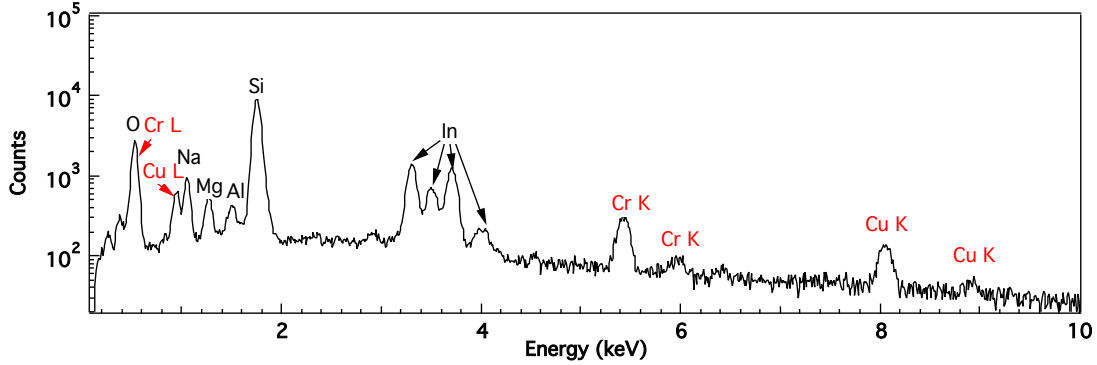

Figure S3. EDAX spectra of  $\text{CuCrO}_2$  film on an ITO/glass substrate. Elements labeled in black fonts are from substrates.

Figure S3 shows the energy dispersive X-ray spectroscopy (EDAX) spectrum of a  $\text{CuCrO}_2$  film on ITO/glass substrate. The signals of Na, Al, Mg, Si, and In are from substrate. The O signal is also mostly from the ITO/glass substrate, hence cannot be used to deduce the oxygen ratio in  $\text{CuCrO}_2$ . Since the Cr L signal overlaps with the O signal,

we use the Cu K signal and Cr K signal to determine their atomic ratio, which is 0.85:1. Based on the discussion in main text, given these  $\text{CuCrO}_2$  nanocrystals have surface Cr oxide layers, it is reasonable that the surface-sensitive XPS observes a lower Cu:Cr ratio than the bulk-sensitive EDAX.

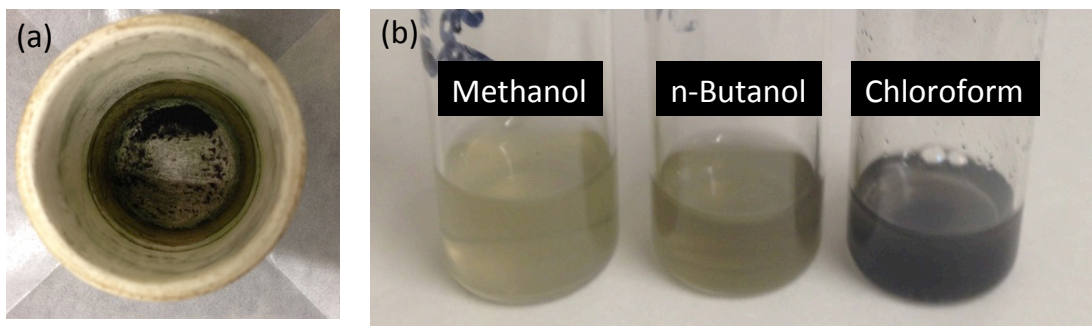

Figure S4. Photographs of (a)  $\text{CuCrO}_2$  powder, and (b)  $\text{CuCrO}_2$  suspensions in selected solvents.

Figure S4(a) shows the dark green  $\text{CuCrO}_2$  powders in a crucible. Figure S4(b) shows three  $\text{CuCrO}_2$  suspensions in solvents with different polarity. In a polar solvent (methanol), the suspension is translucent light green, whereas in a nonpolar solvent (chloroform), the suspension is dark green. DLS measurement shows that the hydrodynamic size of  $\text{CuCrO}_2$  is on the order of  $\mu\text{m}$  when suspension is dark green, indicating a poor dispersion. Other solvents such as ethanol, isopropanol, acetone, acetonitrile, toluene, pyridine, chlorobenzene, and 2-methoxyethanol are also examined.

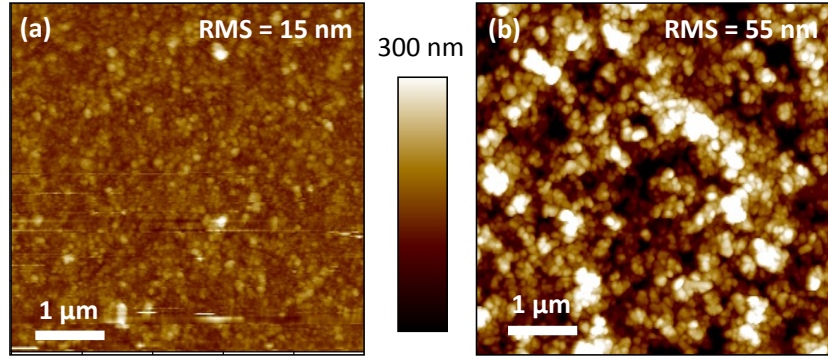

Figure S5. AFM images of (a)  $\sim 30$  nm  $\text{CuCrO}_2$  film, and (b)  $\sim 280$  nm  $\text{CuGaO}_2$  film.

Figure S5 shows the AFM image comparison between the  $\text{CuCrO}_2$  film and  $\text{CuGaO}_2$  film. It is clear that the  $\text{CuCrO}_2$  film is much smoother than  $\text{CuGaO}_2$  film (root-mean-square RMS roughness 15 nm vs. 55 nm). The  $\text{CuCrO}_2$  film is  $\sim 30$  nm thick as determined from ellipsometry, while  $\text{CuGaO}_2$  film is  $\sim 280$  nm according to AFM. Note that these two films are at the smallest thicknesses that warrant a continuous film for either  $\text{CuCrO}_2$  or  $\text{CuGaO}_2$  nanocrystals. Also, the light transmission through these two films is similar ( $> 90\%$ ). Therefore, the morphology comparison is relevant since devices are made on top of such films.

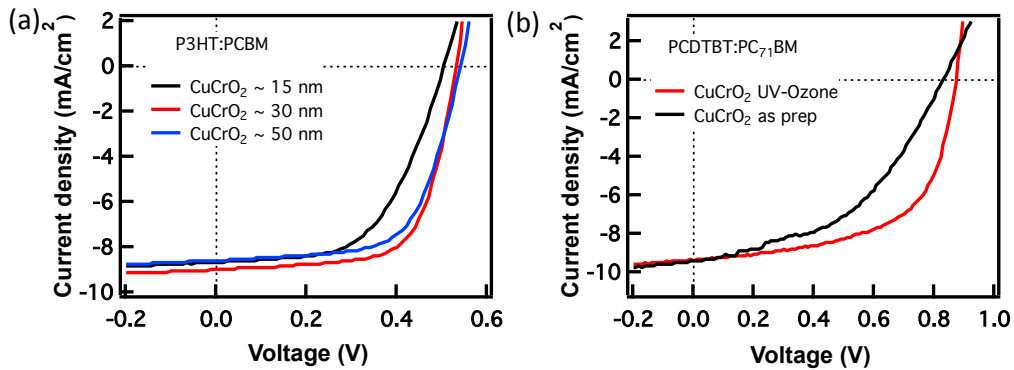

Figure S6.  $J$ - $V$  characteristics under AM 1.5G  $100 \text{ mW/cm}^2$  illumination of (a) P3HT:PCBM devices with different  $\text{CuCrO}_2$  (UV-Ozone treated) thicknesses, and (b) PCDTBT:PC<sub>71</sub>BM devices with  $\sim 30$  nm as prepared or UV-Ozone treated  $\text{CuCrO}_2$  HTL.

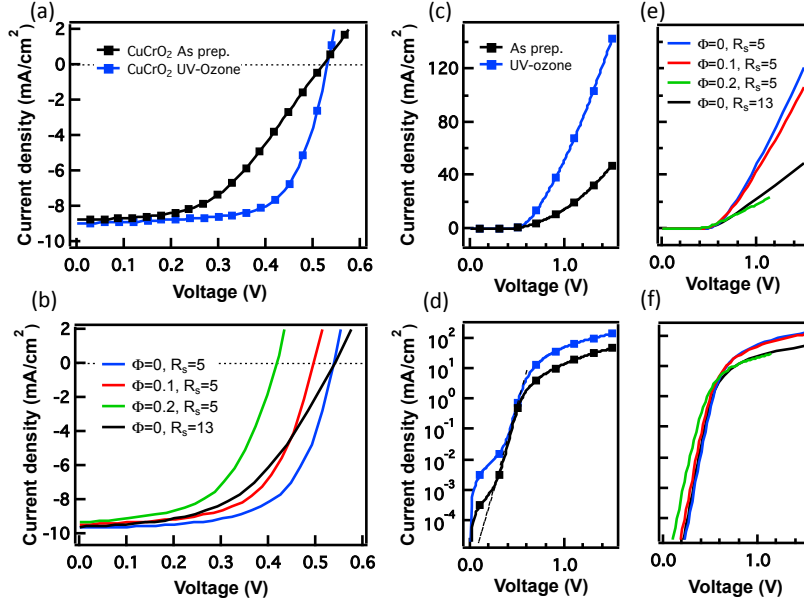

Figure S7.  $J$ - $V$  characteristics of P3HT:PCBM devices under AM 1.5G 100 mW/cm<sup>2</sup> illumination (a)-(b), and in dark (c)-(f). (a), (c), (d) are experimental results, and (b), (e), (f) are SCAPS simulated results. (c) and (d), or (e) and (f), are the same data plotted either in linear-linear scale or log-linear scale.

Figure S7 shows the comparison between experimental  $J$ - $V$  results (same as Figure 6 in main text) and drift-diffusion simulated  $J$ - $V$  results. In the drift-diffusion simulation, the anode injection barrier and series resistance are varied, while the rest parameters are kept constant and listed below.<sup>5</sup> The simulation with 0.2 eV anode injection barrier and 5  $\Omega$  cm<sup>2</sup> series resistance (green line) failed to converge beyond 1.1 V bias. Although increasing injection barrier  $\Phi$  from 0 eV (blue line), to 0.1 eV (red line), and to 0.2 eV (green line) decreases device fill factor ( $FF$ ) and injection current in dark, it also decreases device open-circuit voltage ( $V_{oc}$ ) and turn-on voltage in dark, which is not seen in experimental results. On the other hand, simply adding a 13  $\Omega$  cm<sup>2</sup> series resistance (black line) in simulation leads to very similar (both light and dark)  $J$ - $V$  curves as the experimental results. This simulation confirms the formation of Ohmic contact at hole transport layer/active layer interface for both as prepared and UV-ozone treated CuCrO<sub>2</sub>

films, indicating that the performance of device with as prepared  $\text{CuCrO}_2$  HTL is limited by an internal resistance.

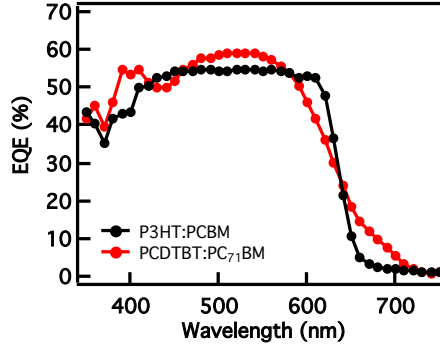

Figure S8. External quantum efficiency (EQE) measurement of P3HT:PCBM and PCDTBT:PC<sub>71</sub>BM devices with  $\sim 30$  nm UV-Ozone treated  $\text{CuCrO}_2$  HTL. The integrated photocurrents are  $8.3 \text{ mA/cm}^2$  and  $8.7 \text{ mA/cm}^2$ , respectively, consistent with  $J_{sc}$  values obtained in  $J$ - $V$  measurement (Table 1&2 in main text).

**Table S1.** Parameters used for drift-diffusion simulation. Except the anode injection barrier and series resistance (red font), the rest parameters are adopted from reference 5.

|                                                                  |                      |
|------------------------------------------------------------------|----------------------|
| Active Layer Thickness (nm)                                      | 210                  |
| Dielectric Permittivity                                          | 3.8                  |
| Electron Affinity (eV)                                           | 3.7                  |
| Effective Bandgap (eV)                                           | 1.0                  |
| Cathode injection barrier (eV)                                   | 0.1                  |
| Anode injection barrier (eV)                                     | 0 or 0.1 or 0.2      |
| Bimolecular Recombination Coefficient ( $\text{cm}^3/\text{s}$ ) | $1.0 \text{ E } -12$ |
| Surface Recombination Velocity ( $\text{cm/s}$ )                 | $1.0 \text{ E } +5$  |
| CB & VB Effective Density of States ( $\text{cm}^{-3}$ )         | $1.0 \text{ E } +20$ |
| Electron Mobility ( $\text{cm}^2/\text{Vs}$ )                    | $2.5 \text{ E } -3$  |
| Hole Mobility ( $\text{cm}^2/\text{Vs}$ )                        | $5.0 \text{ E } -4$  |
| Doping Concentration $N_A$ ( $\text{cm}^{-3}$ )                  | $1 \text{ E } +16$   |
| Series resistance ( $\Omega \text{ cm}^2$ )                      | 5 or 13              |

## References

- 1 M. Han, K. Jiang, J. Zhang, W. Yu, Y. Li, Z. Hu and J. Chu, *J. Mater. Chem.*, 2012, **22**, 18463.
- 2 C. D. Wagner, W. M. Riggs, L. E. Davis, J. E. Moulder and G. E. Muilenberg, *Handbook of X-ray Photoelectron Spectroscopy*, 1st ed.; Perkin-Elmer Corporation: Waltham, MA, 1979.
- 3 E. L. Ratcliff, J. Meyer, K. X. Steirer, A. Garcia, J. J. Berry, D. S. Ginley, D. C. Olson, A. Kahn and N. R. Armstrong, *Chem. Mater.*, 2011, **23**, 4988–5000.
- 4 A. P. Amrute, Z. Łodziana, C. Mondelli, F. Krumeich and J. Pérez-Ramírez, *Chem. Mater.*, 2013, **25**, 4423–4435.
- 5 J. Wang, L. Xu, Y.-J. Lee, M. De Anda Villa, A. V. Malko and J. W. P. Hsu, *Nano Lett.*, 2015, **15**, 7627–7632.
